# Supplementary material for: Which Extraction Solvents and Methods Are More Effective in Terms of Chemical Composition and Biological Activity of Alcea fasciculiflora from Turkey?
Source: MDPI journal article supplement (doi:10.3390/molecules27155011), 2022-08-06
Supplement: s1 [file s1]

# Which Extraction Solvents and Methods Are More Effective in Terms of Chemical Composition and Biological Activity of *Alcea fasciculiflora* from Turkey?

Refiye Beyza Ozturk <sup>1</sup>, Gokhan Zengin <sup>1,\*</sup>, Kouadio Ibrahime Sinan <sup>1</sup>, Domenico Montesano <sup>2,\*</sup>, Dimitrina Zheleva-Dimitrova <sup>3</sup>, Reneta Gevrenova <sup>3</sup>, Abdullahi Ibrahim Uba <sup>4</sup>, Ugur Cakilcioglu <sup>5</sup>, Alevcan Kaplan <sup>6</sup>, Sharmeen Jugreet <sup>7</sup>, Stefano Dall'Acqua <sup>8</sup> and Mohamad Fawzi Mahomoodally <sup>7</sup>

<sup>1</sup>Physiology and Biochemistry Research Laboratory, Department of Biology, Science Faculty, Selcuk University, Konya 42130, Turkey

<sup>2</sup>Department of Pharmacy, University of Naples Federico II, Via D. Montesano 49, 80131 Naples, Italy

<sup>3</sup>Department of Pharmacognosy, Faculty of Pharmacy, Medical University-Sofia, 1431 Sofia, Bulgaria

<sup>4</sup>Department of Molecular Biology and Genetics, Faculty of Engineering and Natural Sciences, Kadir Has University, Istanbul 34083, Turkey

<sup>5</sup>Pertek Sakine Genç Vocational School, Munzur University, 62500 Tunceli, Turkey

<sup>6</sup>Sason Vocational School, Batman University, Batman 72100, Turkey

<sup>7</sup>Department of Health Sciences, Faculty of Medicine and Health Sciences, University of Mauritius, 80837 Réduit, Mauritius

<sup>8</sup>Department of Pharmaceutical and Pharmacological Sciences, University of Padova, Via Marzolo 5, 35131 Padova, Italy

\* Correspondence: gokhanzengin@selcuk.edu.tr (G.Z.); domenico.montesano@unina.it (D.M.)

Table S1. Percentage of variability and eigenvalue explained by each principal component of Principal Component Analysis.

| Principal components | Eigenvalue | Proportion of explained variance | Cumulative proportion of explained variance |
|----------------------|------------|----------------------------------|---------------------------------------------|
| <b>PC1</b>           | 22,09      | 44,19                            | 44,19                                       |
| <b>PC2</b>           | 12,74      | 25,49                            | 69,68                                       |
| <b>PC3</b>           | 3,65       | 7,30                             | 76,98                                       |
| <b>PC4</b>           | 2,64       | 5,28                             | 82,26                                       |
| <b>PC5</b>           | 2,26       | 4,52                             | 86,79                                       |
| <b>PC6</b>           | 1,98       | 3,97                             | 90,76                                       |

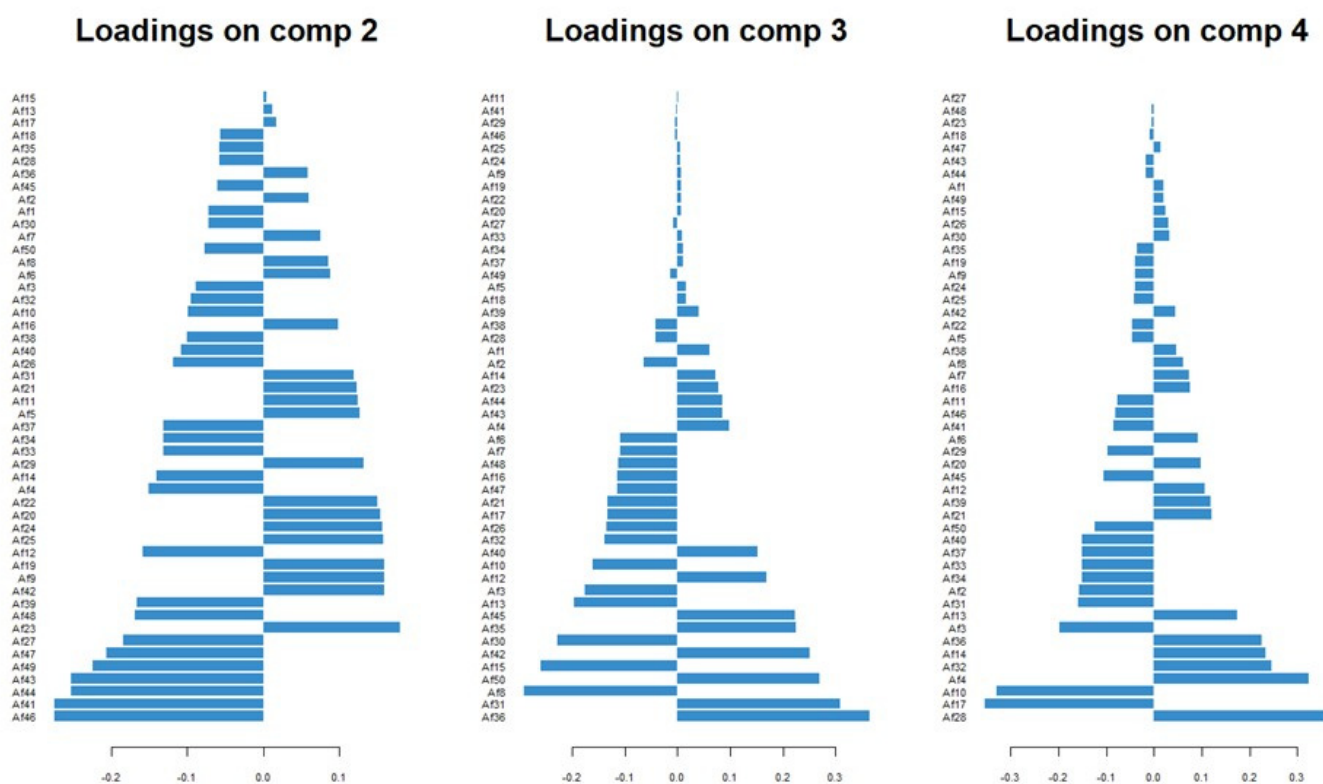

Figure S1. Relation between the bioactivities and the first four retained principal component. For compounds numbers refer to Table 1.
